# Supplementary material
Source: publisher figshare collection journal article supplement (https://acs.figshare.com/ndownloader/files/25035883)
Supplement: Supplementary file 1 [file 25035883]

## **Cover pages for the supporting information**

### **Title:**

Quantitative proteomic analysis of porcine intestinal epithelial cells infected with porcine deltacoronavirus using iTRAQ-coupled LC-MS/MS

### **Authors' names:**

Xinrong Zhou<sup>1</sup>, Lei Zhou<sup>1</sup>, Xinna Ge<sup>1</sup>, Xin Guo<sup>1</sup>, Jun Han<sup>1</sup>, Yongning Zhang\*<sup>1</sup>,  
Hanchun Yang\*<sup>1</sup>

### **Authors' affiliations:**

<sup>1</sup>Key Laboratory of Animal Epidemiology of Ministry of Agriculture and Rural Affairs,  
College of Veterinary Medicine, China Agricultural University, Beijing 100193, P.R.  
China.

### **\*Corresponding information:**

College of Veterinary Medicine, China Agricultural University, No. 2 Yuanmingyuan  
West Road, Haidian District, Beijing 100193, P.R. China.

E-mail addresses: zhangyongning@cau.edu.cn (Y. Zhang); yanghanchun1@cau.edu.cn  
(H. Yang).

**Table. All supplementary components**

| File Names              | Description of supporting files                                                                                                                                                                                                                                                                                                                                                                                                                                                                                                                                                                                                                                                                          |
|-------------------------|----------------------------------------------------------------------------------------------------------------------------------------------------------------------------------------------------------------------------------------------------------------------------------------------------------------------------------------------------------------------------------------------------------------------------------------------------------------------------------------------------------------------------------------------------------------------------------------------------------------------------------------------------------------------------------------------------------|
| Supplementary Figure S1 | Repeatability analysis of different biological replicates used for iTRAQ-coupled LC–MS/MS proteomic analysis. (A) The coefficient of variation (CV) distribution between groups. (B) Repeatability analysis of three technical replicates of PDCoV-infected IPEC-J2 cells. (C) Repeatability analysis of three technical replicates of mock-infected IPEC-J2 cells. The x-axis represents the variation levels of proteins in PDCoV- or mock-infected IPEC-J2 cells between three technical replicates. The left y-axis represents the frequency of quantitative proteins (histograms) and the right y-axis represents the cumulative percentage of proteins at different variation levels (line graph). |
| Supplementary Figure S2 | The original images of the entire PVDF membranes containing the target western blots of Figure 2C. The expected size of ANAPC7, IFIT1, $\beta$ -actin and PDCoV-N proteins are 63, 57, 42 and 41 kDa, respectively.                                                                                                                                                                                                                                                                                                                                                                                                                                                                                      |
| Supplementary File S1   | A total of 5502 proteins identified in PDCoV- and mock-infected IPEC-J2 cells using iTRAQ-coupled LC-MS analysis.                                                                                                                                                                                                                                                                                                                                                                                                                                                                                                                                                                                        |
| Supplementary File S2   | Viral proteins identified in PDCoV-infected IPEC-J2 cells.                                                                                                                                                                                                                                                                                                                                                                                                                                                                                                                                                                                                                                               |
| Supplementary File S3   | GO function annotation of the 78 differentially expressed proteins.                                                                                                                                                                                                                                                                                                                                                                                                                                                                                                                                                                                                                                      |
| Supplementary File S4   | COG function classification of the 78 differentially expressed proteins.                                                                                                                                                                                                                                                                                                                                                                                                                                                                                                                                                                                                                                 |
| Supplementary File S5   | KEGG pathway analysis of the 78 differentially expressed proteins.                                                                                                                                                                                                                                                                                                                                                                                                                                                                                                                                                                                                                                       |
| Supplementary File S6   | The top 20 KEGG pathway of the 23 significantly upregulated proteins.                                                                                                                                                                                                                                                                                                                                                                                                                                                                                                                                                                                                                                    |
| Supplementary File S7   | The top 20 KEGG pathway of the 55 significantly downregulated proteins.                                                                                                                                                                                                                                                                                                                                                                                                                                                                                                                                                                                                                                  |

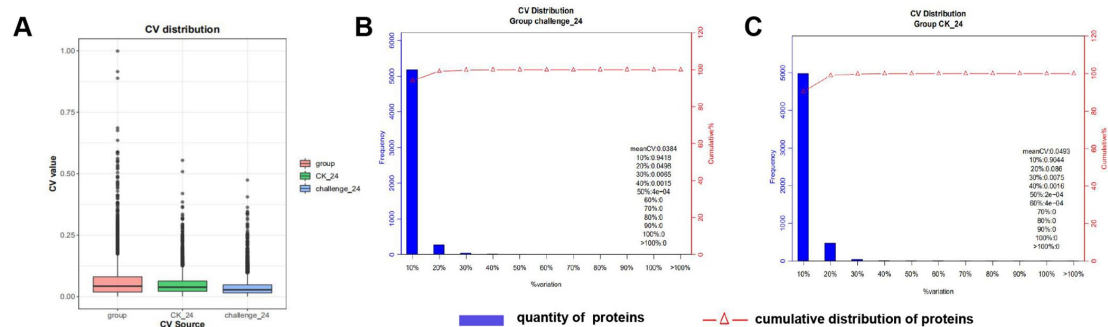

**Supplementary Figure S1.** Repeatability analysis of different biological replicates used for iTRAQ-coupled LC–MS/MS proteomic analysis. (A) The coefficient of variation (CV) distribution between groups. (B) Repeatability analysis of three technical replicates of PDCoV-infected IPEC-J2 cells. (C) Repeatability analysis of three technical replicates of mock-infected IPEC-J2 cells. The x-axis represents the variation levels of proteins in PDCoV- or mock-infected IPEC-J2 cells between three technical replicates. The left y-axis represents the frequency of quantitative proteins (histograms) and the right y-axis represents the cumulative percentage of proteins at different variation levels (line graph).

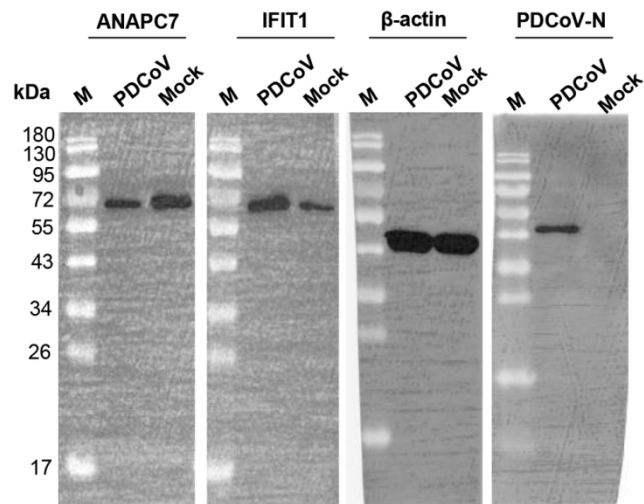

**Supplementary Figure S2.** The original images of the entire PVDF membranes containing the target western blots of Figure 2C. The expected size of ANAPC7, IFIT1,  $\beta$ -actin and PDCoV-N proteins are 63, 57, 42 and 41 kDa, respectively.
